# Supplementary material for: Synthesis, characterization and electromagnetic performance of nanocomposites of graphene with α-LiFeO2and β-LiFe5O8
Source: Royal Society of Chemistry journal article supplement (doi:10.1039/c5tc00778j), 2015-01-01
Supplement: c5tc00778j1.pdf [file c5tc00778j1.pdf]

## Supporting Information for

# Synthesis, Characterization and Electromagnetic Performance of Nanocomposites of Graphene with $\alpha$ -LiFeO<sub>2</sub> and $\beta$ -LiFe<sub>5</sub>O<sub>8</sub>

Hong Wu,<sup>a</sup> Huifeng Li,<sup>a</sup> Genban Sun,<sup>\*ab</sup> Shulan Ma<sup>a</sup> and Xiaojing Yang<sup>\*a</sup>

<sup>a</sup> Beijing Key Laboratory of Energy Conversion and Storage Materials and College of Chemistry, Beijing Normal University, Beijing 100875, China.

<sup>b</sup> Department of Materials Physics and Chemistry, University of Science and Technology Beijing, Beijing 100083, China.

Fax: +86-10-58802075; Tel: +86-10-62242577

E-mail: gbsun@bnu.edu.cn (G. Sun); yang.xiaojing@bnu.edu.cn (X. Yang)

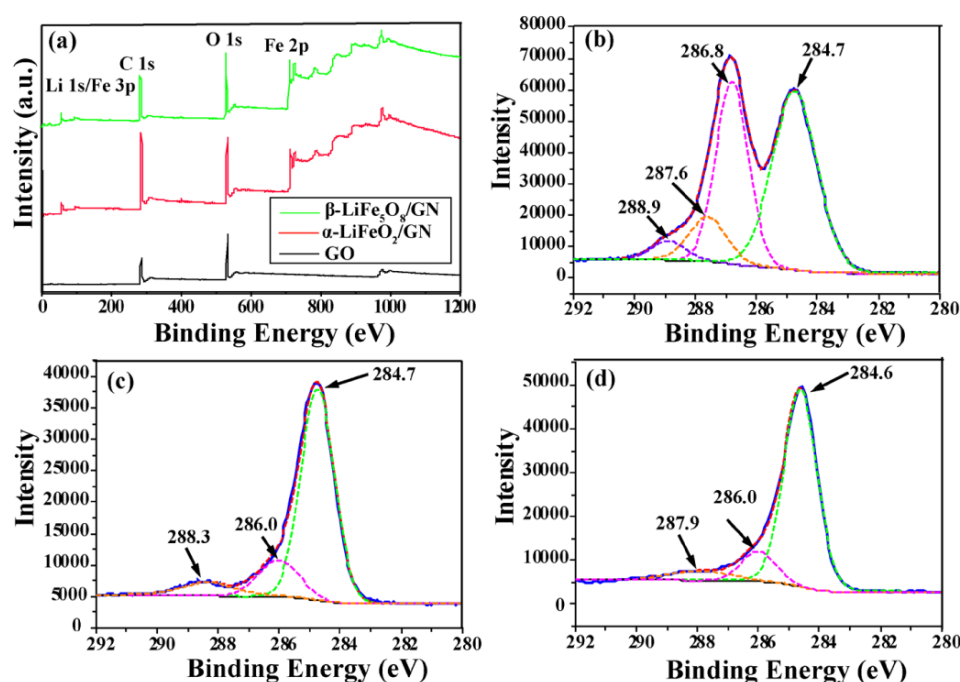

**Fig. S1** (a) Survey scans for XPS spectra of GO (black),  $\alpha$ -LiFeO<sub>2</sub>/GN (red), and  $\beta$ -LiFe<sub>5</sub>O<sub>8</sub>/GN (green) nanocomposites. C 1s peaks of (b) GO, (c)  $\alpha$ -LiFeO<sub>2</sub>/GN, and (d)  $\beta$ -LiFe<sub>5</sub>O<sub>8</sub>/GN nanocomposites.

In the XPS spectra (Fig. S1a), the main peaks observed in the survey scans of the two nanocomposites are C 1s, O 1s, and Fe 2p, Li 1s/Fe 3p (the peaks of Li 1s and Fe 3p overlap) peaks centered at *ca.* 285, 530, 710 and 55 eV, respectively. The XPS spectra of C 1s for GO in Fig. S1b could be identified into C entities, corresponding to single or double bonds in aromatic rings [i.e., C–C (sp<sup>2</sup> carbon, C1), C–O (C2), C=O (C3), C(O)O (C4) bonds] with a binding energy of about 284.7, 286.8, 287.6 and 288.9 eV, respectively. As shown in Figs. S1 c and d, the C4 peaks located at 288.9 eV disappeared in nanocomposites, meanwhile, the C2 peaks located at 286.0 eV and C3 peaks located at 288.3/287.9 eV became prominently weaker, confirming the effective conversion of most sp<sup>3</sup> hybridized carbon atoms of GO to sp<sup>2</sup> hybridized carbons.
